# Supplementary material for: Data-Driven Identification of Biomarkers for In Situ Monitoring of Drug Treatment in Bladder Cancer Organoids
Source: MDPI journal article supplement (doi:10.3390/ijms23136956), 2022-06-23
Supplement: s1 [file s1]

## Supplementary Materials

**Table S1.** Most relevant features identified in PCA loadings.

| <b>Dataset</b>      | <b><math>\nu_1</math> [cm<sup>-1</sup>]</b> | <b><math>\nu_2</math> [cm<sup>-1</sup>]</b> | <b><math>\nu_3</math> [cm<sup>-1</sup>]</b> | <b><math>\nu_4</math> [cm<sup>-1</sup>]</b> | <b><math>\nu_5</math> [cm<sup>-1</sup>]</b> |
|---------------------|---------------------------------------------|---------------------------------------------|---------------------------------------------|---------------------------------------------|---------------------------------------------|
| <i>Nuclei</i>       |                                             |                                             |                                             |                                             |                                             |
| RT112               | 744                                         | 1315                                        | 1450                                        | 1585                                        | 1660                                        |
| BCO                 | 751                                         | 1308                                        | 1447                                        | 1591                                        | 1660                                        |
| UCO                 | 680                                         | 1406                                        | 1499                                        | 1591                                        | 1666                                        |
| <i>Mitochondria</i> |                                             |                                             |                                             |                                             |                                             |
| RT112               | 1092                                        | 1251                                        | 1321                                        | 1635                                        | 1700                                        |
| BCO                 | 1255                                        | 1325                                        | 1460                                        | 1600                                        | 1730                                        |
| UCO                 | 1138                                        | 1242                                        | 1317                                        | 1451                                        | 1658                                        |

**Table S2.** Relative improvement [%] of the FeaSel-Net biomarker retrieval compared to the PCA loadings method (accuracy ACC, sensitivity SEN, and specificity SPE).

| <b>Dataset</b>                | <b>ACC</b> | <b>SEN</b> | <b>SPE</b> |
|-------------------------------|------------|------------|------------|
| <i>Nuclei (average)</i>       | 10.1       | 18.0       | 7.1        |
| RT112                         | 13.6       | 23.9       | 9.5        |
| BCO                           | 7.2        | 12.6       | 5.1        |
| UCO                           | 9.6        | 17.6       | 6.6        |
| <i>Mitochondria (average)</i> | 5.3        | 9.1        | 3.6        |
| RT112                         | 8.3        | 14.6       | 5.7        |
| BCO                           | 1.9        | 3.2        | 1.4        |
| UCO                           | 5.5        | 10.1       | 3.8        |
| <i>All Data</i>               | 7.3        | 12.8       | 5.1        |

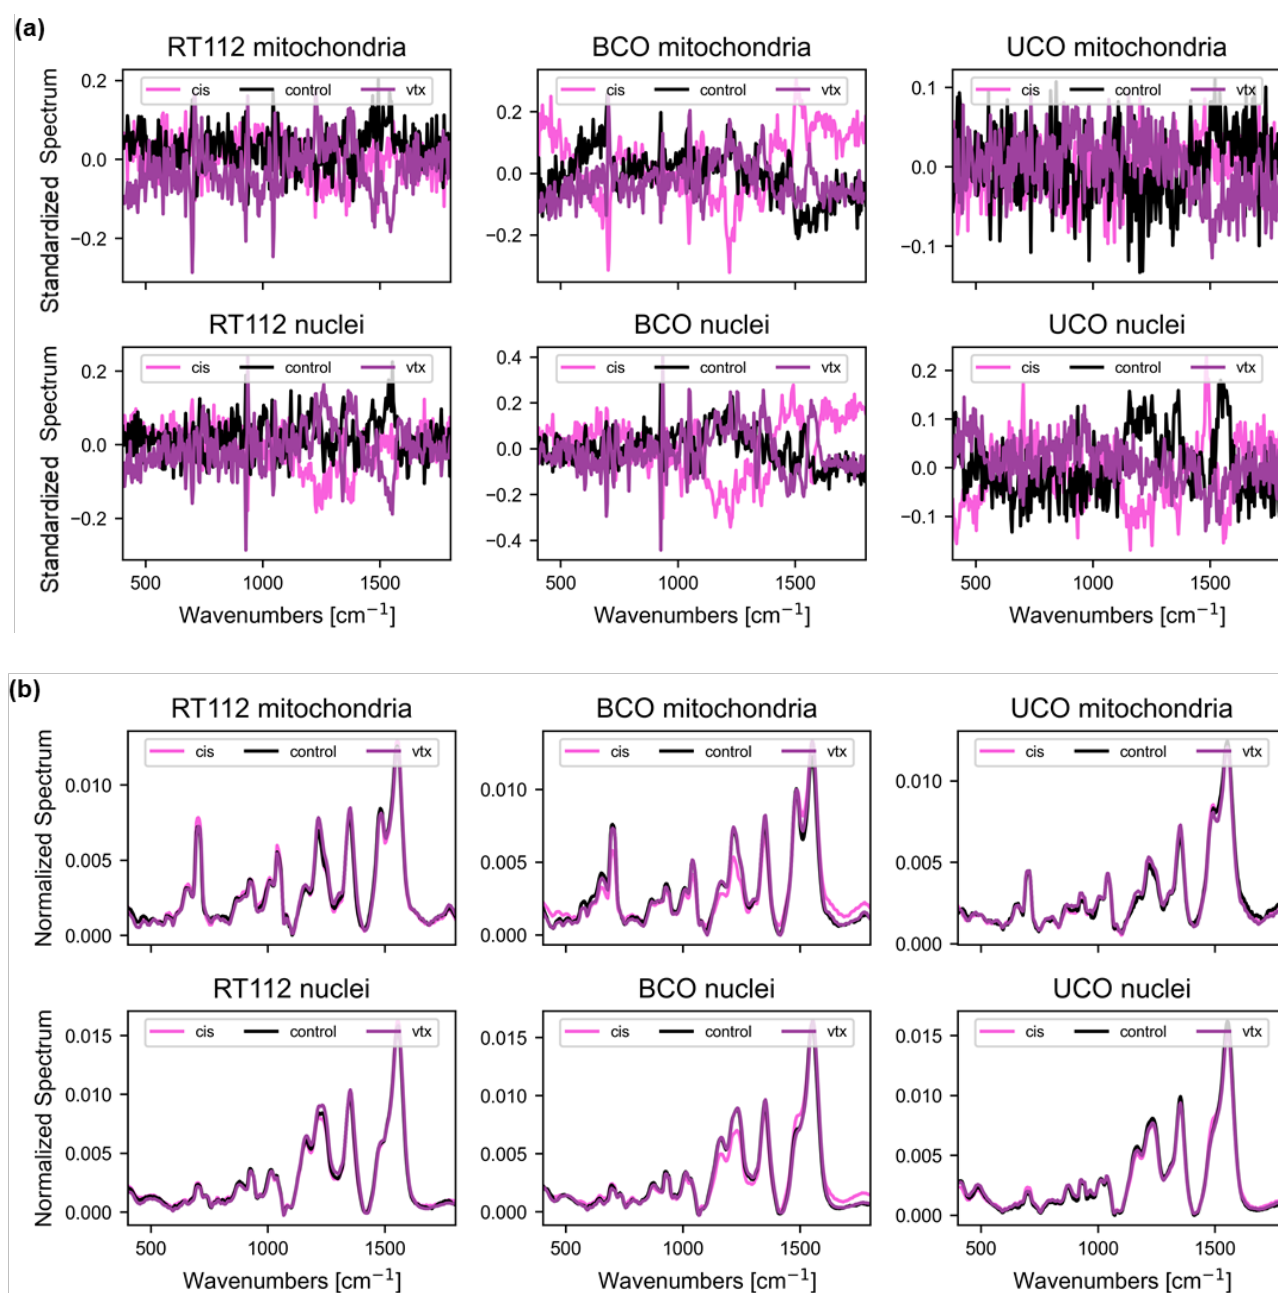

**Figure S1. Raman spectra averaged over each class. (a)** shows the mean spectra for the standardized spectra along the feature axis whereas **(b)** shows the normalized spectrum along the sample axis.

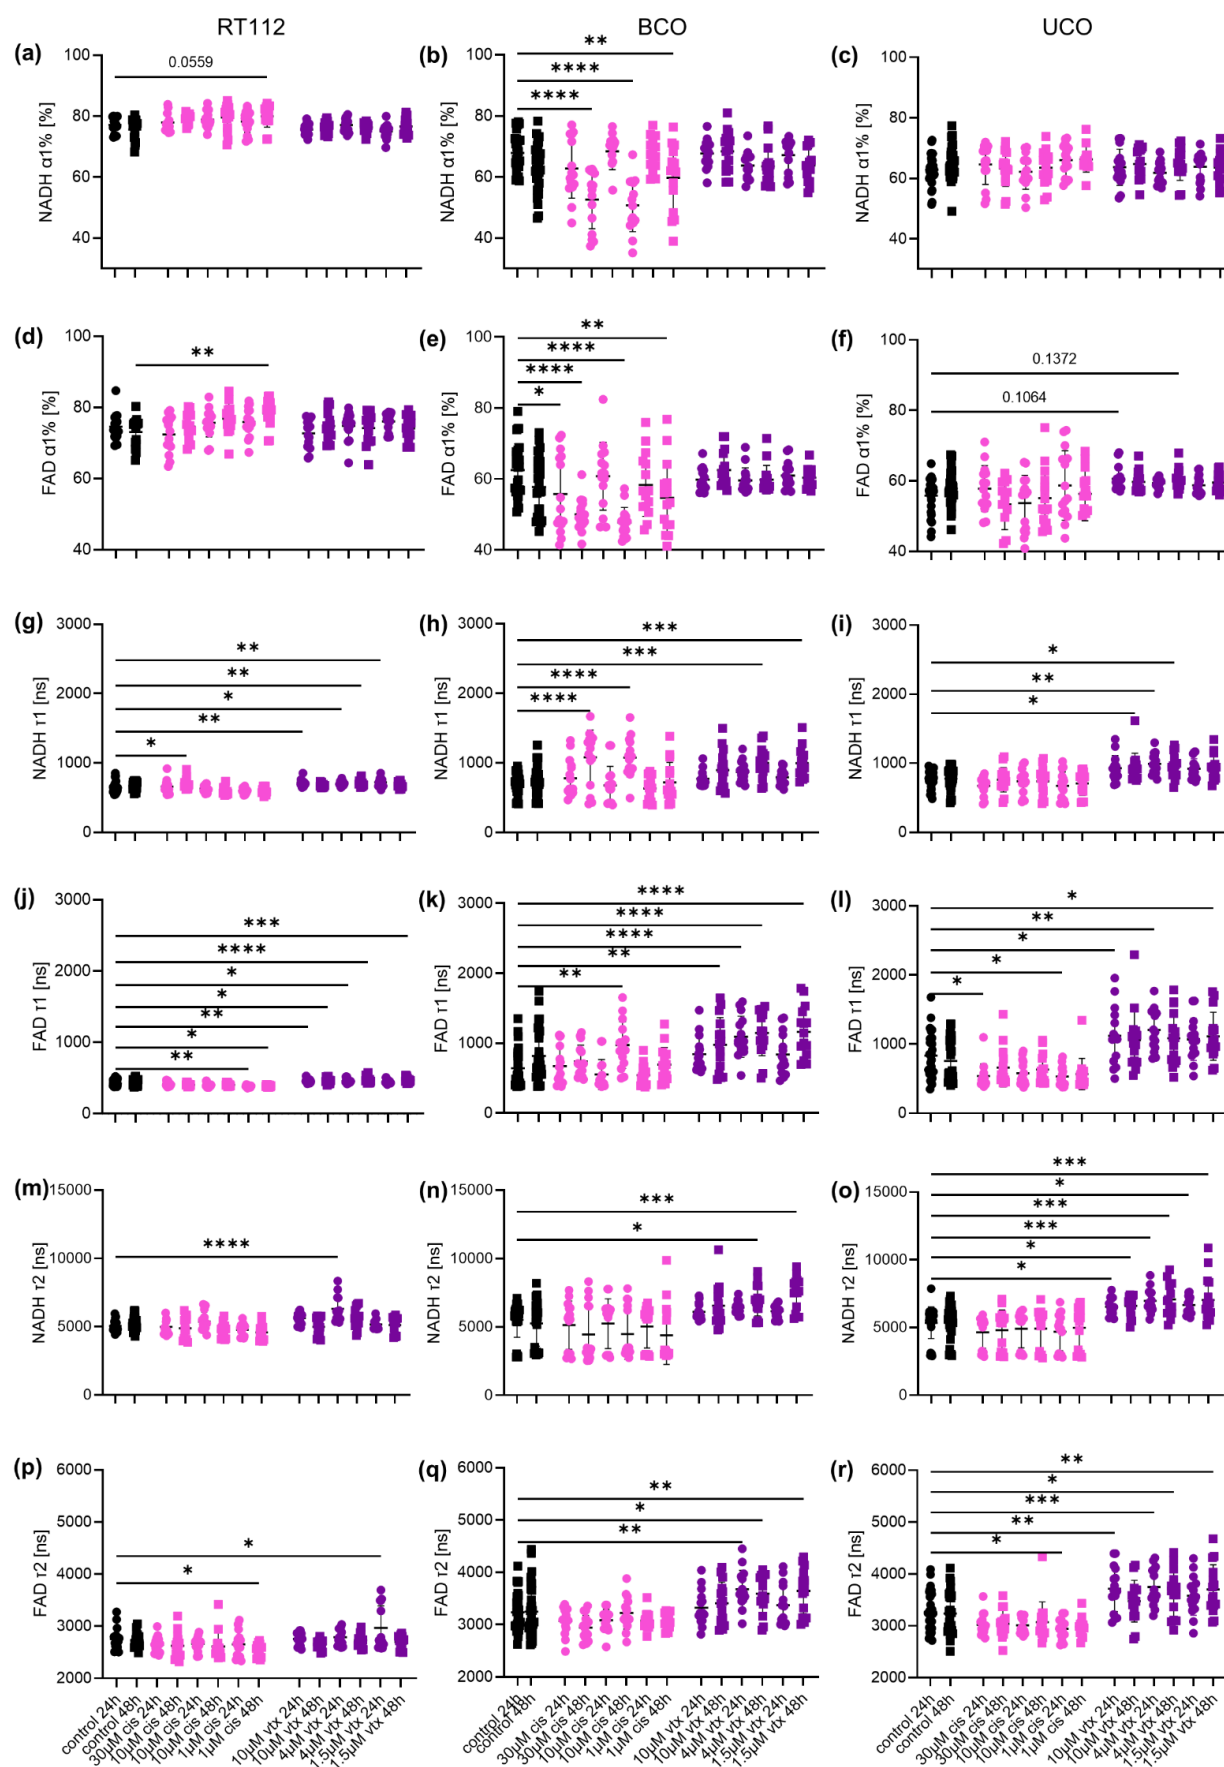

**Figure S2. FLIM results for organoids derived from the cell line RT112, BCO and UCO. (a-c) α1% from NADH. (d-f) α1% from FAD. (g-i) τ1 from NADH. (j-l) τ1 from FAD. (m-o) τ2 from NADH. (p-r) τ2 from FAD. Data represent average FLIM parameters per organoid, n=15, One-way ANOVA, p<0.05.**

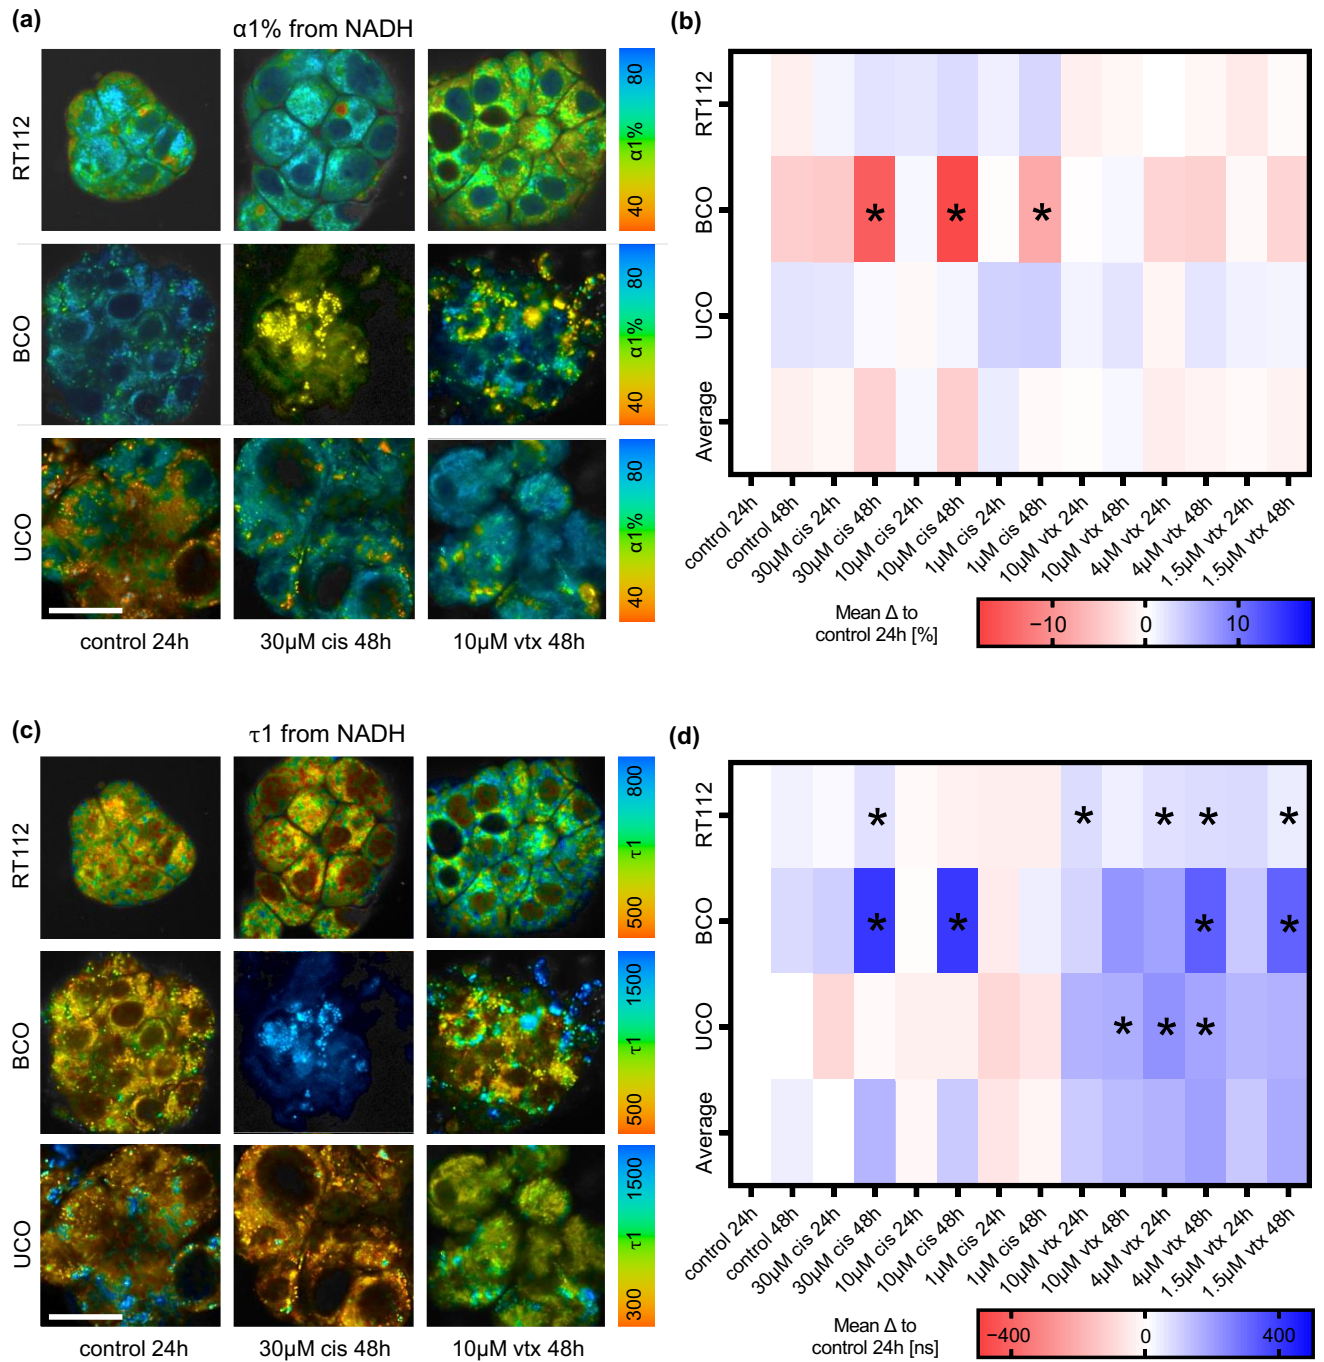

**Figure S3. NADH FLIM of bladder cancer organoids.** (a)  $\alpha 1\%$  and (c)  $\tau 1$  of RT112, BCO and UCO. Displayed are untreated organoids after 24 hours, 30  $\mu$ M *cis* treated organoids after 48 hours and 10  $\mu$ M *vtx* treated organoids after 48 hours. Scale bar: 25  $\mu$ m. (b) Heatmap of mean differences of NADH  $\alpha 1\%$  to the control after 24 hours. (d) Heatmap of mean differences of NADH  $\tau 2$  to the control after 24 hours. One-way ANOVA,  $n=15$ ,  $p<0.05$ .

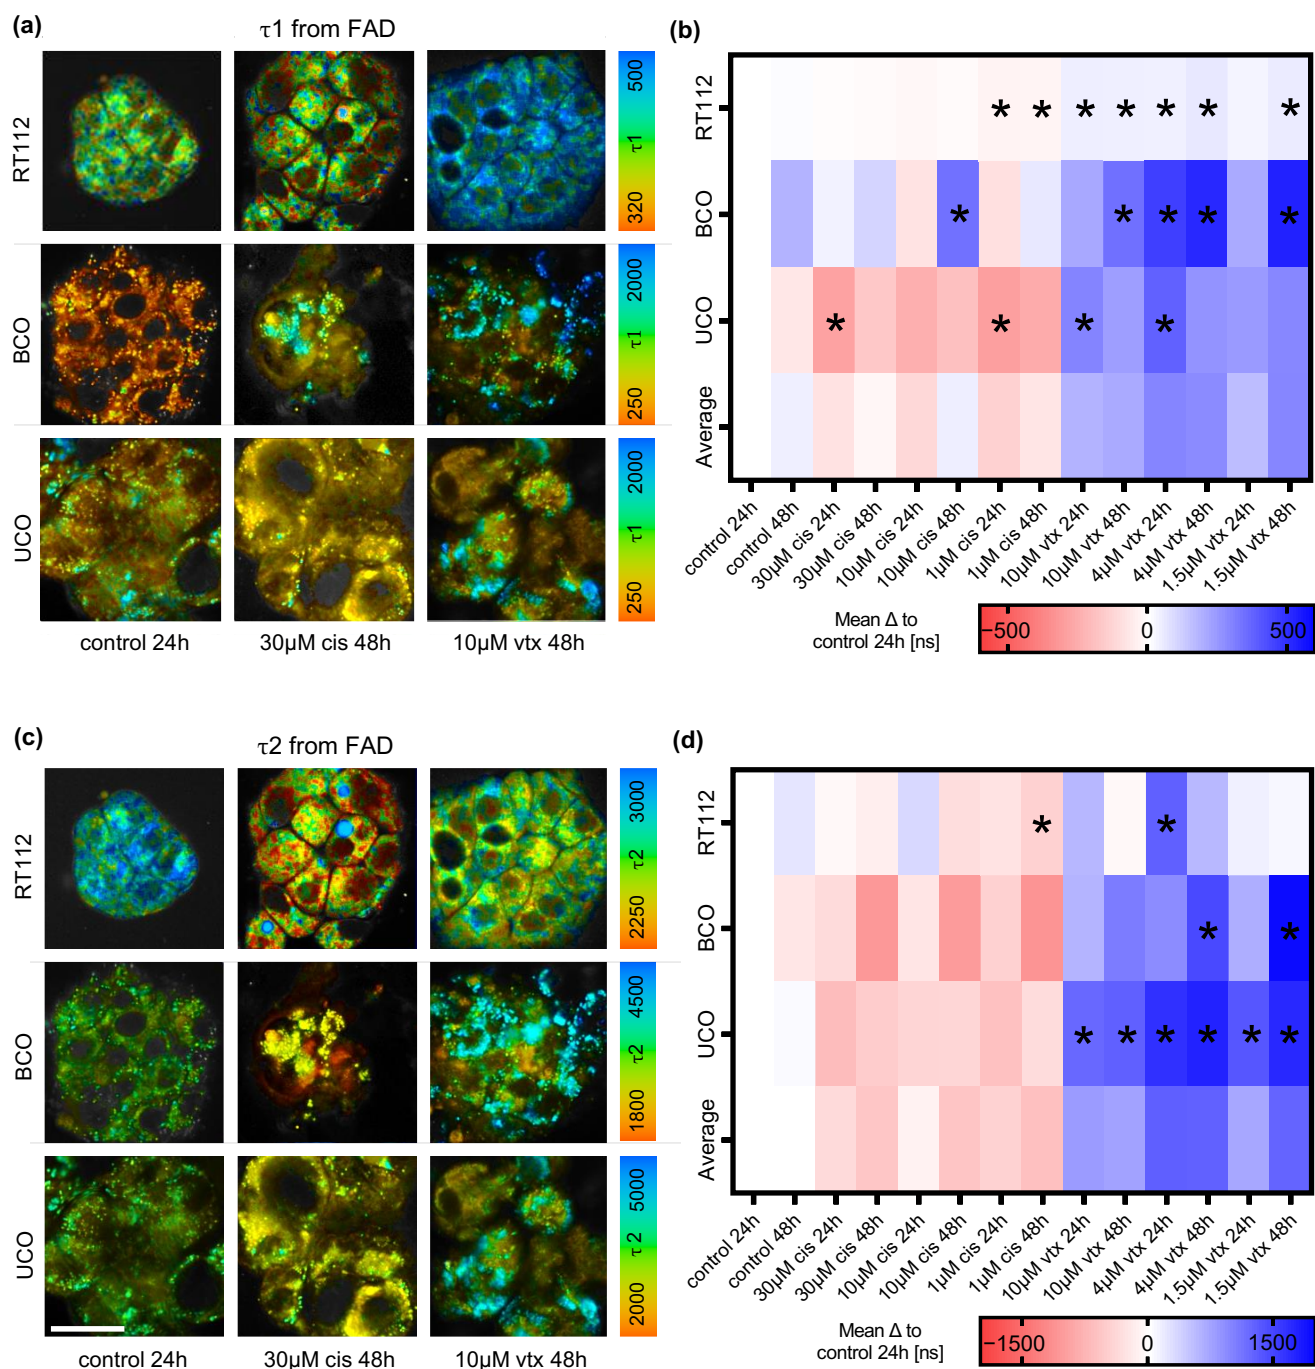

**Figure S4. FAD FLIM of bladder cancer organoids.** (a)  $\tau_1$  from FAD and  $\tau_2$  from FAD (c) of RT112, BCO and UCO. Displayed are untreated organoids after 24 hours, 30 $\mu$ M *cis* treated organoids after 48 hours and 10 $\mu$ M *vtx* treated organoids after 48 hours. Scale bar: 25 $\mu$ m. (b) Heatmap of mean differences of  $\tau_1$  from FAD to the control after 24 hours. (d) Heatmap of mean differences of  $\tau_2$  from FAD to the control after 24 hours. Statistical analysis: One-way ANOVA,  $n=15$ ,  $p<0.05$ .

**Table S3.** Information on tumor samples.

| <b>Patient</b>     | <b>UCO</b>    | <b>BCO</b>         |
|--------------------|---------------|--------------------|
| Age (years)        | 85            | 64                 |
| Gender             | male          | male               |
| Localization       | bladder       | bladder            |
| Tumor Stage (pT)   | pT1           | pT2                |
| Tumor Grade (G)    | G2            | G3                 |
| Specimen retrieval | Rinsing urine | Radical cystectomy |

**Table S4.** Parameters for the FeaSel-Net Callback.

| <b>Parameter</b>                    | <b>Symbol</b>  | <b>Value</b> |
|-------------------------------------|----------------|--------------|
| Number of features                  | $n_f$          | 3            |
| Evaluation type                     | -              | accuracy     |
| Threshold value                     | $\tau_{acc}$   | 0.98         |
| Threshold decay                     | $\sigma_{acc}$ | 0.0          |
| Minimum number of epochs            | $d_{min}$      | 20           |
| Maximum number of epochs            | $d_{max}$      | 150          |
| Pruning rate                        | $\pi$          | 0.2          |
| Pruning type                        | -              | exponential  |
| Number of samples per class (eval.) | $n_s$          | 10           |
| Normalization of eval. loss         | -              | min-max norm |
| Decision metric                     | -              | average      |
